# Supplementary material for: New water fractions and their relationships to climate and catchment properties across Alpine rivers
Source: Copernicus journal article supplement (doi:10.5194/egusphere-2023-1854), 2023-09-21
Supplement: Supplementary file 1 [file egusphere-2023-1854-supplement.pdf]

## Supplement

### New water fractions and their relationships to climate and catchment properties across Alpine rivers

Marius G. Floriancic<sup>1,2</sup>, Michael P. Stockinger<sup>3</sup>, James W. Kirchner<sup>1,4</sup>, Christine Stump<sup>3</sup>

<sup>1</sup> Dept. of Environmental Systems Science, ETH Zürich, Zürich, Switzerland

<sup>2</sup> Dept. of Civil, Environmental and Geomatic Engineering ETH Zürich, Zürich, Switzerland

<sup>3</sup> Department of Water, Atmosphere and Environment, Institute of Soil Physics and Rural Water Management, University of Natural Resources and Life Sciences, Muthgasse 18, 1190 Vienna, Austria

<sup>4</sup> Swiss Federal Research Institute WSL, Birmensdorf, Switzerland

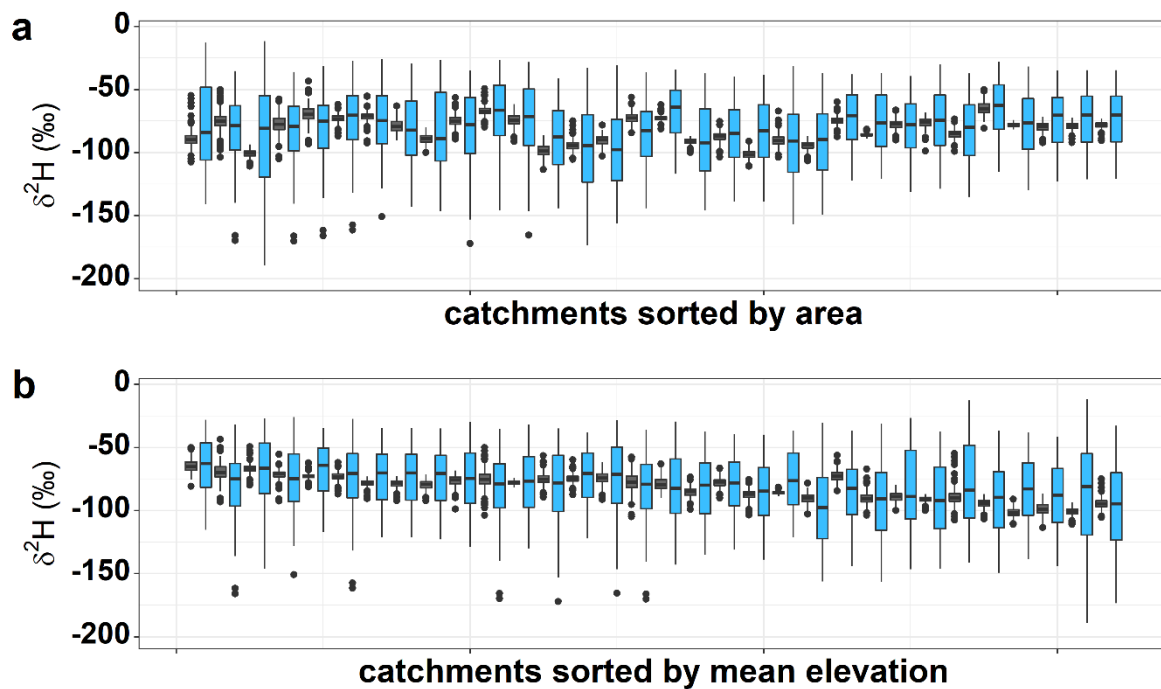

Figure S1: Boxplots of the  $\delta^2\text{H}$  isotopic composition of precipitation (light blue) and streamflow (dark grey) across all 32 Alpine catchments sorted by catchment area (a) and mean catchment elevation (b).

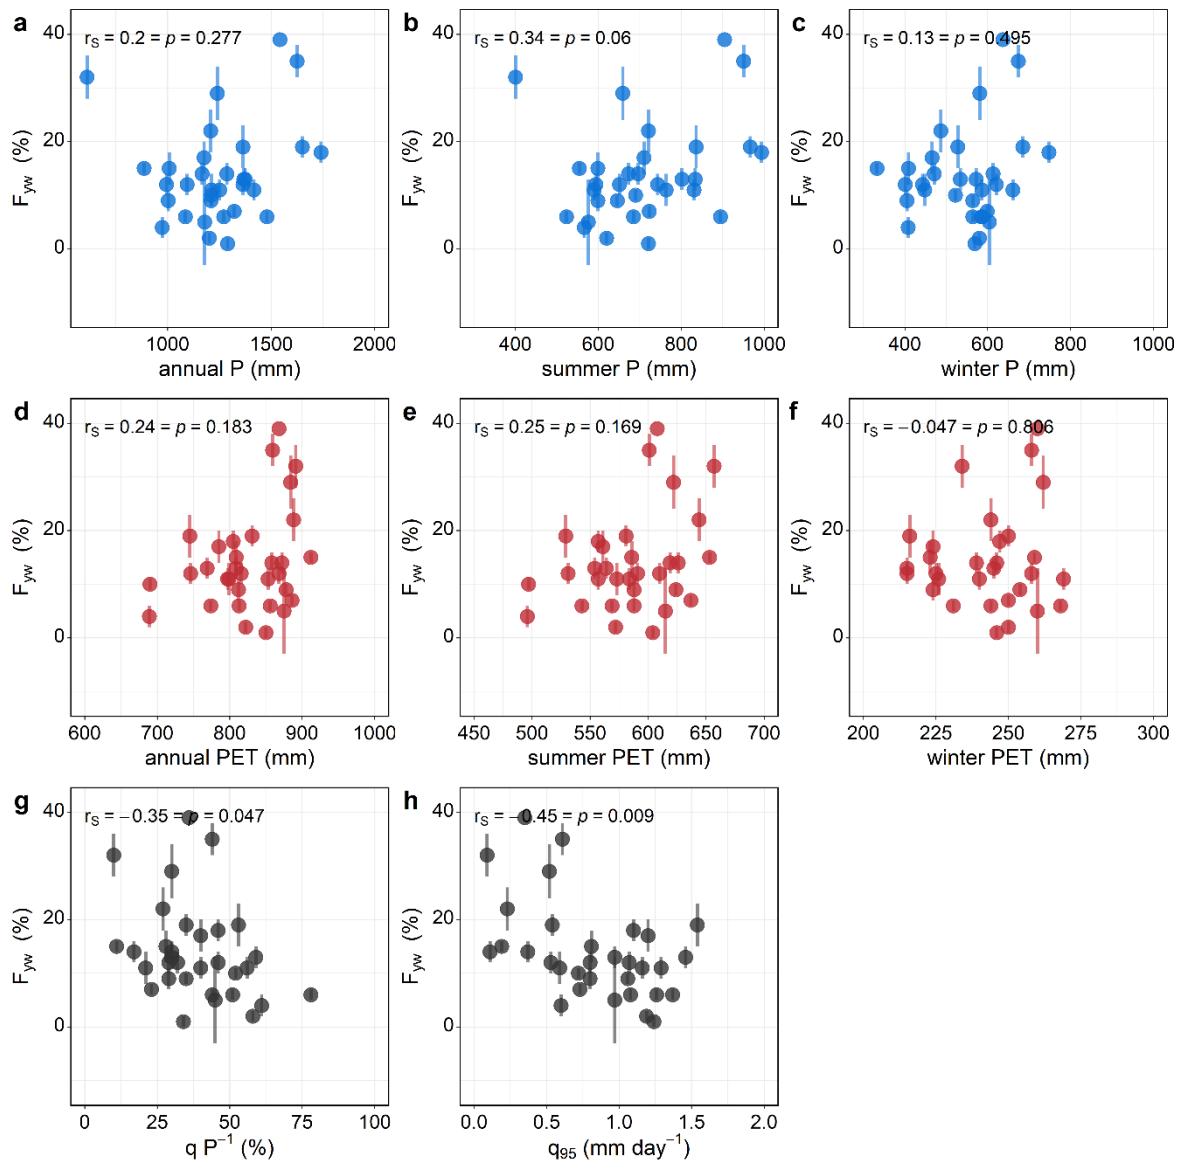

**Figure S2: Relation of volume weighted young water fractions ( $F_{yw}$ ) and (a) annual precipitation, (b) summer (May through October) precipitation, (c) winter (November through April) precipitation, (d) annual potential evapotranspiration, (e) summer (May through October) potential evapotranspiration, (f) winter (November through April) potential evapotranspiration, (g) the fraction of annual discharge in relation to annual precipitation ( $q P^{-1}$ ), and (h) and  $q_{95}$ , the discharge reached or exceeded 95% of the year. While  $F_{yw}$  are not strongly related to precipitation,  $F_{yw}$  are related to  $PET$  and the hydrological variables.**

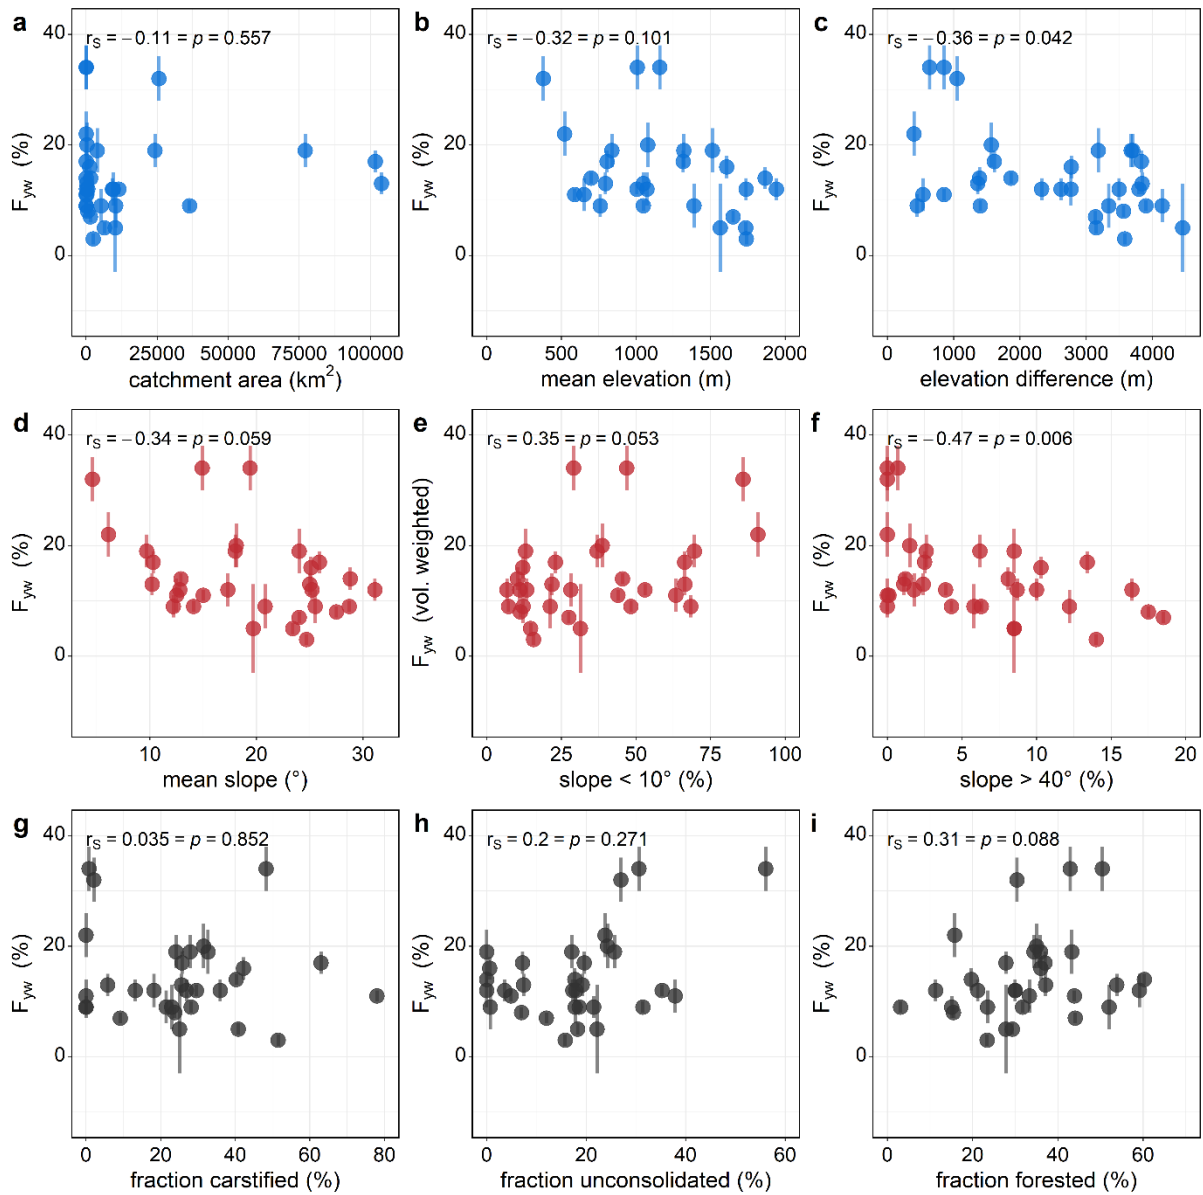

**Figure S3: Relation of volume weighted young water fractions ( $F_{yw}$ ) and (a) catchment area, (b) elevation difference, (c) elevation difference divided by area, (d) mean slope, (e) fraction of slope smaller  $10^\circ$ , (f) fraction of slope steeper  $40^\circ$ , (g) fraction of the catchment consisting of carstified rocks, (h) fraction of the catchment covered by unconsolidated rocks, and (i) fraction of catchment covered by forests.  $F_{yw}$  are strongly related to elevation difference and fraction of slope larger  $40^\circ$ .**
